# Supplementary material
Source: PubMed Central journal article supplement (PMC5089352)
Supplement: DS_10.1177_1941738116657074.pdf [file DS_10.1177_1941738116657074.pdf]

## **Appendix.** Goals and volume progression for each phase

---

### **Phase 1**

---

#### Goals

---

- Intended to assist players in the return-to-sport process following an injury that has removed the player from overhead activity for an extended period of time
- Prepare the player to compete in 2 games without overloading the upper extremity

#### Volume progression

---

- Average progression in total stroke volume at each step is 16%

### **Phase 2**

---

#### Goals

---

- Concentrate on stroke technique while building strength and endurance necessary for match play<sup>3,10</sup>
- May be used as an accelerated return to play for an individual who has been out for a short period of time
- May be used by coaches working on developing a young player that is preparing for their first competition or to incrementally increase a player's endurance

#### Volume progression

---

- Average progression in total stroke volume at each step is 20%

### **Phase 3**

---

#### Goals

---

- Concentrate on stroke power and endurance, and can be used by coaches and health care professionals as a progressive training tool during a competitive season

#### Volume progression

---

- Average progression in total stroke volume at each step is 36%

### **General guidelines for interval program**

---

- Injured athletes should participate in and complete phase 1 and 2 before attempting phase 3 due to the step rate of progression
- Each step should begin with a 20-stroke warm-up performed at 50% of maximum effort
